# Supplementary material for: HDHL-INTIMIC: A European Knowledge Platform on Food, Diet, Intestinal Microbiomics, and Human Health
Source: MDPI journal article supplement (doi:10.3390/nu14091881), 2022-04-29
Supplement: s1 [file s1]

| Organisation name ▼                                                                                        | Acronym organisation ▼↑ |
|------------------------------------------------------------------------------------------------------------|-------------------------|
| Amedes genetics GmbH                                                                                       | AME                     |
| Ben-Gurion University of the Negev                                                                         | BGU                     |
| Leibniz Institute for Prevention Research and Epidemiology - BIPS                                          | BIPS                    |
| Bonn University                                                                                            | BU                      |
| Department of Endocrinology, Diabetology and Clinical Nutrition, University of Kiel                        | CAU                     |
| Chalmers University, Division Food and Nutrition Science, Department of Biology and Biological Engineering | CHALMERS                |
| Centre d'Immunologie et des Maladies Infectieuses                                                          | CIMI                    |
|                                                                                                            | CNR-IBBA                |
| Consiglio Nazionale delle Ricerche- Istituto di Fisiologia Clinica                                         | CNR-IFC                 |
| Research Centre for Food and Nutrition, CREA (Council for Agricultural Research and Economics)             | CREA                    |
| Human Nutrition Research Center                                                                            | CRNH-RA                 |
| Helmholtz Zentrum München                                                                                  | HMGU                    |
| Hospital Regional Universitario de Málaga-Instituto de Investigación Biomédica de Málaga                   | IBIMA-FIMABIS           |
| Flanders Research Institute for Agriculture, Fisheries and Food                                            | ILVO                    |
| Institute of Network Biology, Helmholtz Zentrum München                                                    | INET                    |
| INRA Unité de Nutrition Humaine                                                                            | INRA-UNH                |
| INSERM-University of Rouen                                                                                 | INSERM-UR               |
| Instituto de Productos Lácteos de Asturias                                                                 | IPLA-CSIC               |
| Istituto Superiore di Sanità                                                                               | ISS                     |
| Max Delbrueck Center for Molecular Medicine                                                                | MDC                     |
| INRA/ University of Clermont Auvergne                                                                      | MEDIS                   |
| Institute for Laboratory Animal Science, Hannover Medical School                                           | MHH                     |
| Institute of Clinical Microbiology and Hygiene, University Hospital Regensburg                             | MHR                     |
| Migal - Galilee Research Institute                                                                         | MIGAL                   |
| Max Rubner-Institut                                                                                        | MRI                     |
| Medical University of Graz                                                                                 | MUG                     |
| Medical University of Vienna                                                                               | MUW                     |
| The Open University of Israel                                                                              | OPENU                   |
| Sigmund Freud University Vienna                                                                            | SFU                     |
| Netherlands Organisation for applied scientific research                                                   | TNO                     |
| University of Barcelona, Nutrition & Food Science Department                                               | UB                      |
| Gothenburg University                                                                                      | UGOT                    |
| University of Gothenburg                                                                                   | UGOT                    |
| University of Gothenburg                                                                                   | UGOT                    |
| Institute of Animal Science, University of Hohenheim,                                                      | UHO                     |
| University Clinic RWTH Aachen, Medical Clinic III                                                          | UH-RWTH                 |
| NUTRIM School of Nutrition and Translational Research in Metabolism, Maastricht University                 | UM                      |
| University Medical Center Groningen                                                                        | UMCG                    |
| University of Milan, Department of Food, Environmental and Nutritional Sciences                            | UMIL                    |
| University of Milano, Department of Pharmacological and Biomolecular Sciences                              | UMIL                    |
| University of Bari Aldo Moro                                                                               | UNIBA                   |
| Alma Mater Studiorum University of Bologna                                                                 | UNIBO                   |
| Faculty of Science and Technology, Free University of Bolzano                                              | UNIBZ                   |
| University of Florence, Department of Biology                                                              | UNIFI-BIO               |
| University of Florence, NEUROFARBA Department                                                              | UNIFI-NEUROFARBA        |
| University of Graz                                                                                         | UNIGRAZ                 |
| Unilever Research & Development                                                                            | UNILEVER                |
| University of Naples Federico II                                                                           | UNINA                   |
| Federico II University Dept Clinical Medicine and Surgery                                                  | UNINA2                  |
| University of Turin                                                                                        | UNITO                   |
| University of Vienna                                                                                       | UNIVIE                  |
| University of Veterinary Medicine Vienna, Institute for Milk Hygiene, Milk Technology and Food Science     | VMU                     |
| Wageningen University and Research                                                                         | WUR                     |
